# Supplementary material for: Enhancing the sequence coverage of nanodiamond-extracted early secretory proteins from the Mycobacterium tuberculosis complex
Source: Royal Society of Chemistry journal article supplement (doi:10.1039/d4ay00314d), 2024-01-01
Supplement: d4ay00314d1.pdf [file d4ay00314d1.pdf]

# Supporting information

## **Enhancing Sequence Coverage of Nanodiamond-extracted Early Secretory Proteins from *Mycobacterium tuberculosis* Complex**

Po-Chi Soo<sup>2</sup>, Ching-Chieh Lee<sup>1</sup>, Meng-Fu Shie<sup>1</sup>, Avinash A. Patil<sup>1</sup>, Mhikee Janella N. Descanzo<sup>1</sup>, Ya-Ching Chin<sup>1</sup>, Xi-An Chen<sup>1</sup>, Yu-Tze Horng<sup>2</sup>, Chih-Bin Lin<sup>3</sup>, Jen-Jyh Lee<sup>3</sup>, Cheng-Kang Chiang<sup>4</sup>, Wen-Ping Peng<sup>\*,1</sup>

<sup>1</sup>Department of Physics, National Dong Hwa University, Shoufeng, Hualien, Taiwan

<sup>2</sup>Department of Laboratory Medicine and Biotechnology, Tzu Chi University, Hualien, Taiwan

<sup>3</sup>Department of Internal Medicine, Buddhist Tzu Chi General Hospital and Tzu Chi University, Hualien, Taiwan

<sup>4</sup>Department of Chemistry, National Dong Hwa University, Shoufeng, Hualien, Taiwan

### ***FTIR measurement***

The functional groups on the surface of the DND was measured using an MB154 FTIR spectrometer interferometer (ABB Inc, Bomem, Zurich, Switzerland) with the sample in ambient environment. Before the measurement, 2 mg of the DND powder was dissolved in 60  $\mu$ L of DDW. Then, 20  $\mu$ L of the solution was carefully dropped on a silicon wafer and dried in air to form a thin film. The measured spectrum is shown in Figure S1.

### ***Zeta measurements***

The zeta potentials of DNDs (50 g/mL) at different pH conditions were measured using a Malvern Zetasizer Nano-ZS (Malvern Instruments Inc., United Kingdom) equipped with a HeNe laser at a wavelength of 632.8 nm (standard: red) at room temperature. Each zeta potential measurement was repeated six times, with the final mean values plotted in supporting Figure S2.

### ***Flowchart for protein analysis***

In Figure S5, we developed an algorithm to reduce the interference from other proteins. For those high mass peaks with  $m/z > 3000$ , the Flex control program cannot automatically select those peptide peaks. Thereby, it is of necessity to pick those peptide peaks manually. Therefore, pre-peak selection is necessary for peptide analysis with CI-CCA matrix (Table 1). Then we removed the baseline and smoothed the mass spectrum. Next for those BSA and ACR[31] peptide peaks were all removed. We noticed that when the ACR peptide peaks were removed, both CFP-10 and ESAT-6 proteins were identified simultaneously by Mascot software with the scores of 55 and 51. The sequence coverage of CFP-10 and ESAT-6 were 94% and 100%.

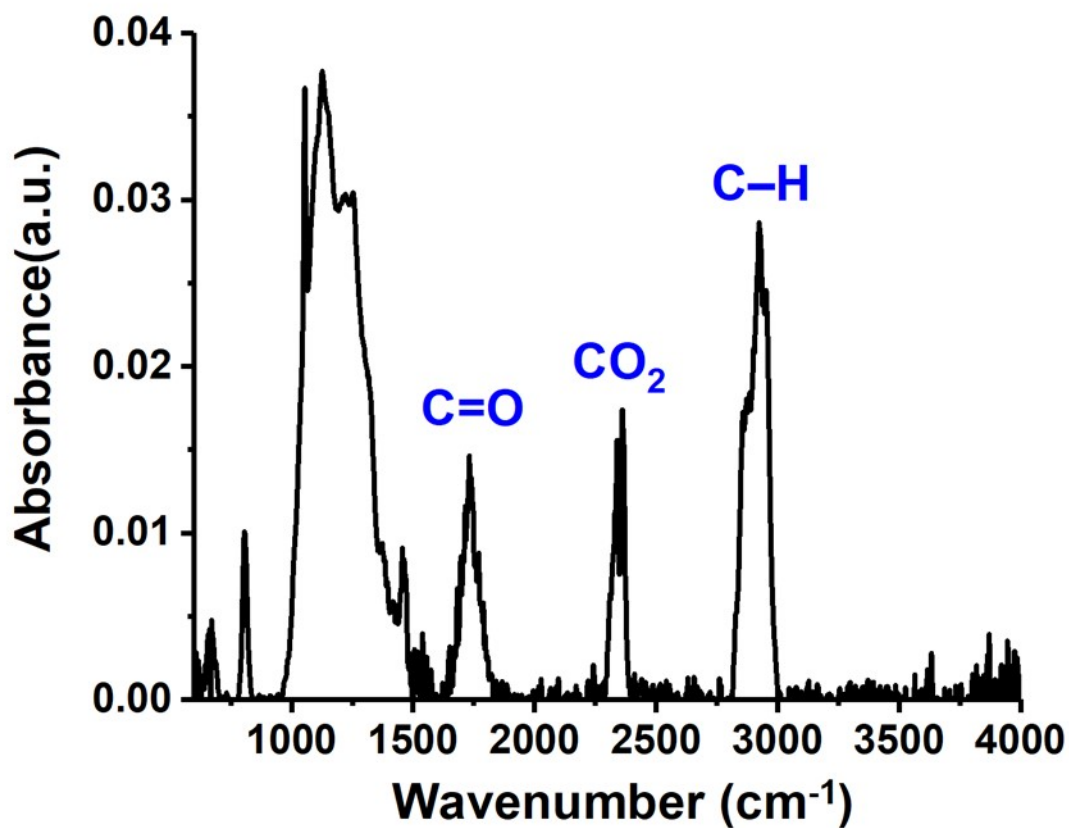

Figure S1 Surface functional groups present on the surface of the 5 nm DND validated using FTIR spectroscopy. It is generally known that NDs are an exceptional platform for protein adsorption. NDs strongly adsorb proteins through the combination of ionic interaction, hydrophobic interaction, hydrogen bonding, and van der Waals interaction. In addition to this, functional groups, such as carboxylic groups, play a significant role in the efficient adsorption of proteins.

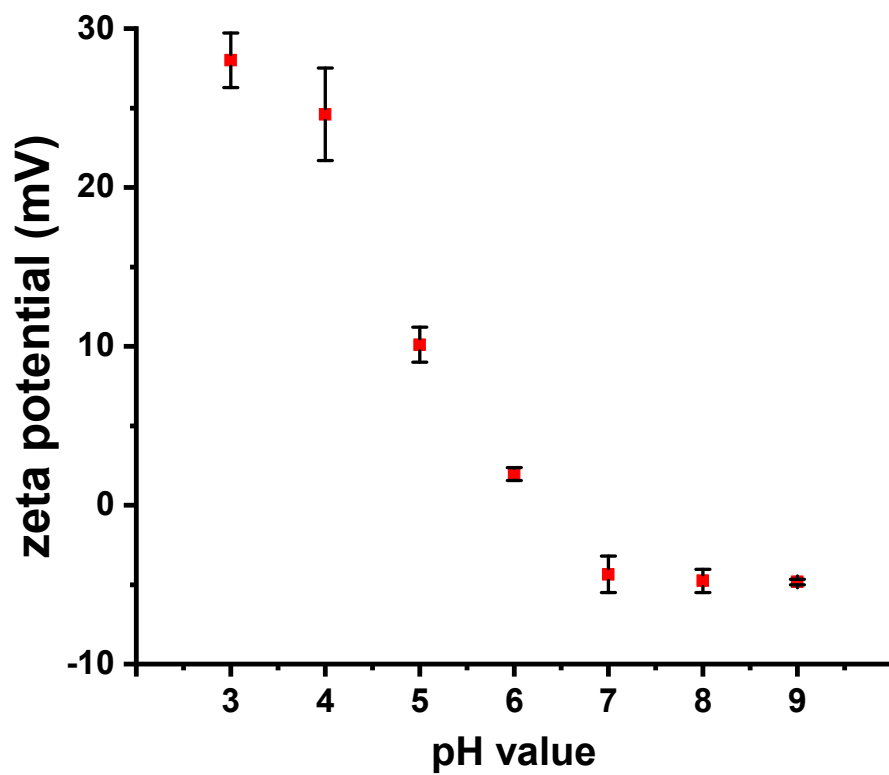

Figure S2 Zeta potential measurement for DND nanoparticles at different pH conditions. The pH was adjusted with 16 mM phosphate buffer.

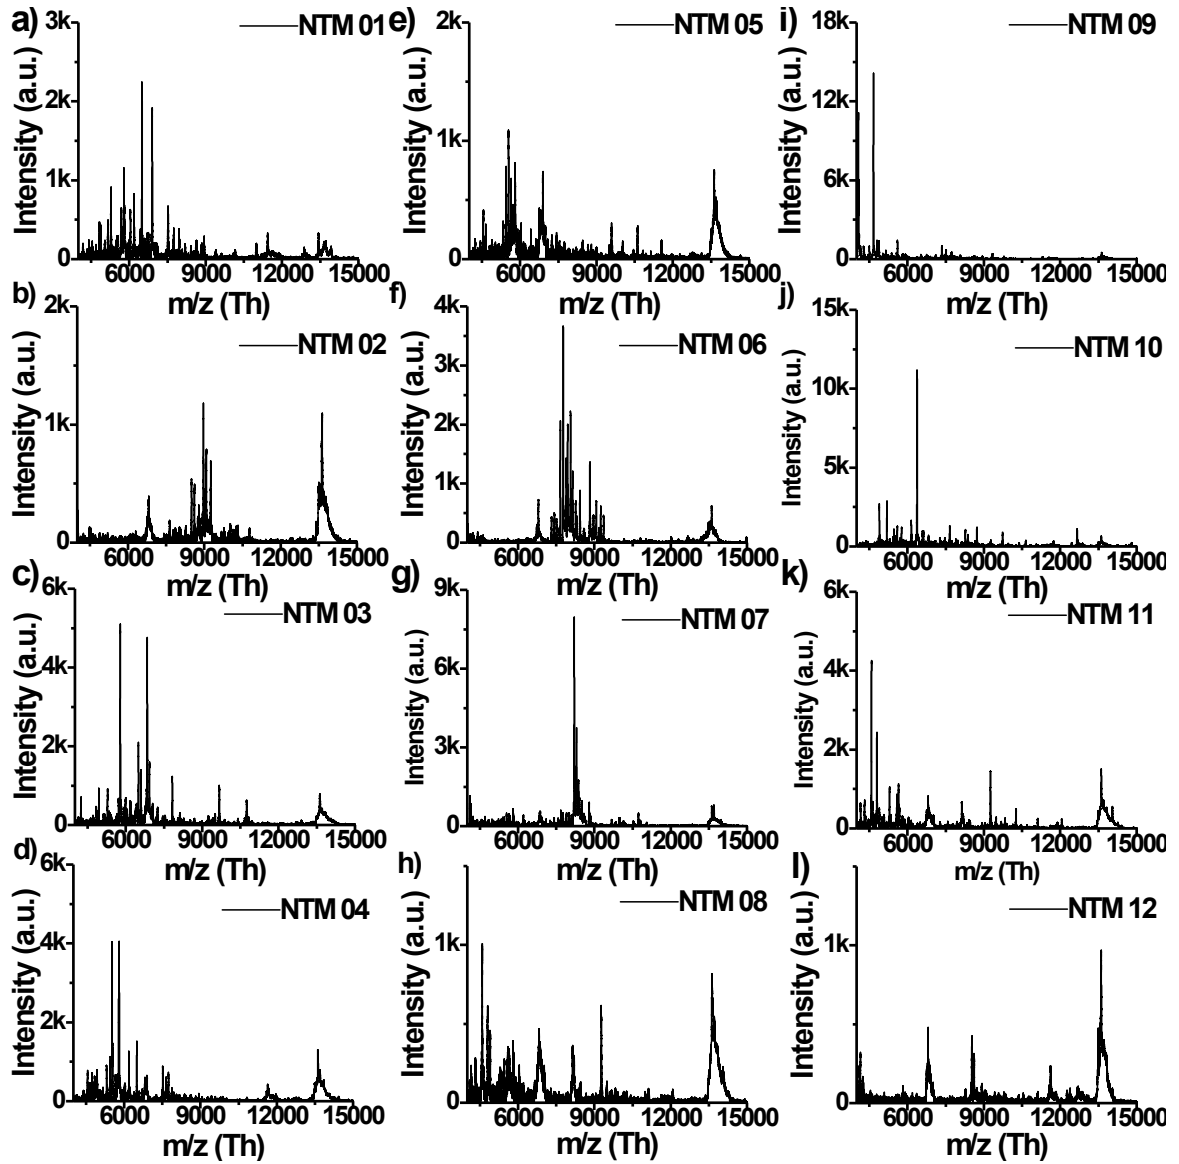

Figure S3 MALDI mass spectra of proteins extracted by DND from NTM isolates, a-l.

TB biomarker protein signals were absent in NTM isolates.

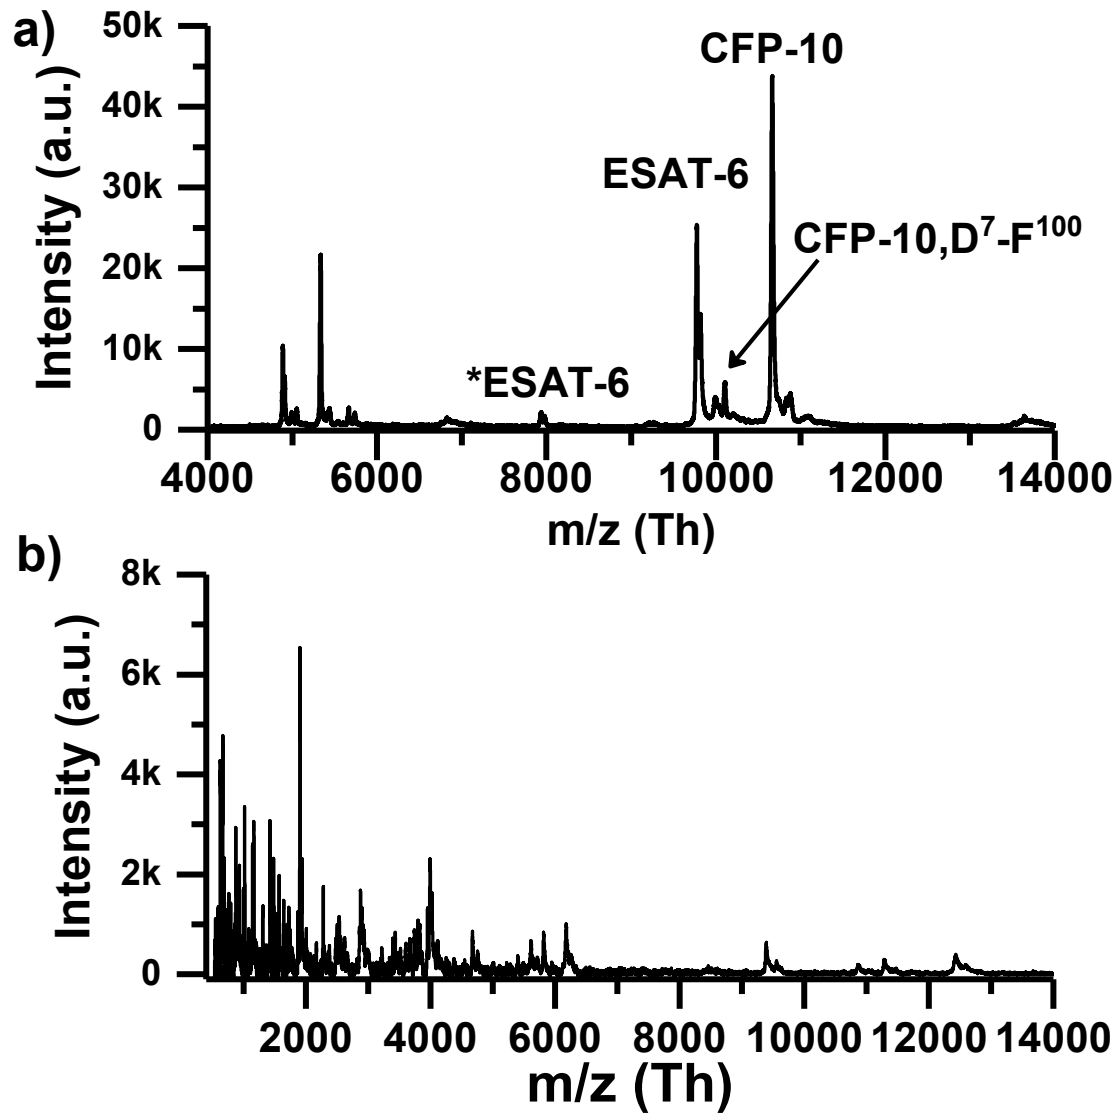

Figure S4 a) MALDI mass spectrum of CFP-10 and ESAT-6 proteins extracted by DND from MTC isolates. b) Tryptic peptide mass spectra of MTC proteins (Figure S3a) after on-diamond digestion. The CFP-10 and ESAT-6 protein peaks were almost absent after trypsin digestion.

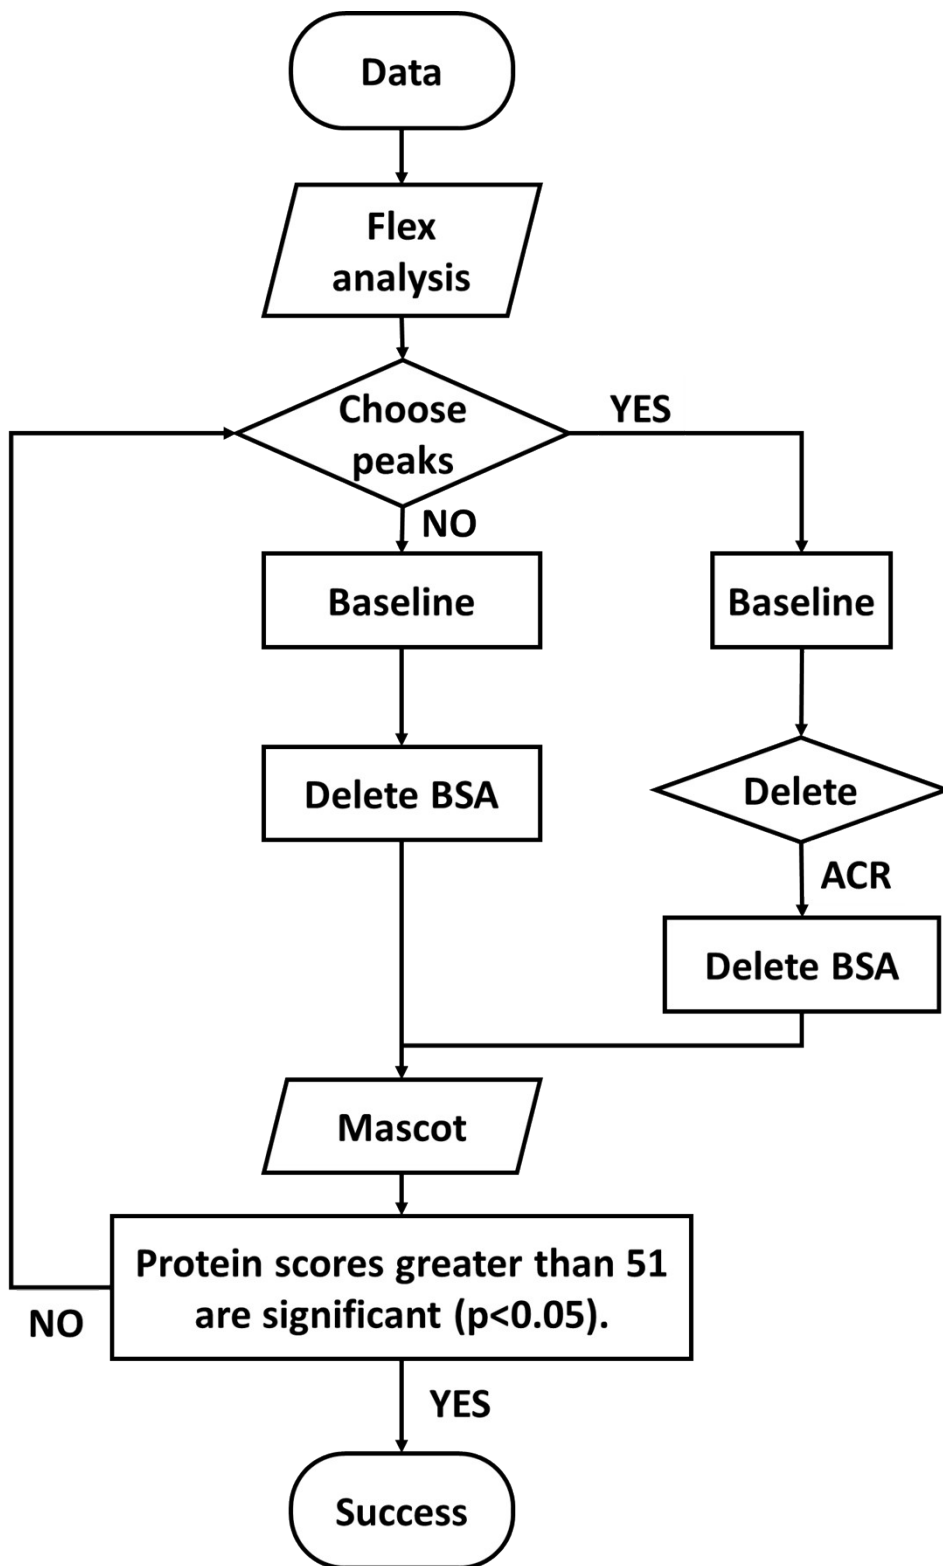

Figure S5 Flowchart for peptide sequence analysis

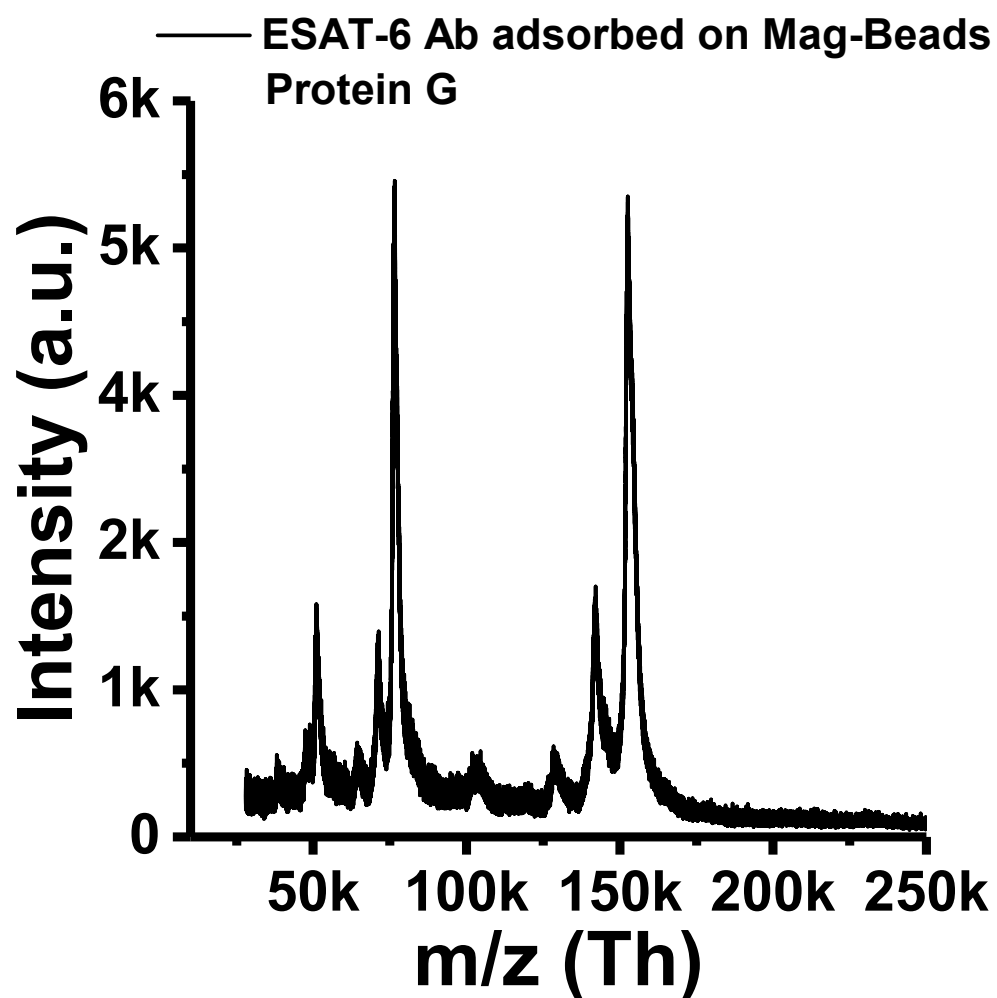

Figure S6 MALDI mass spectrum of ESAT-6 Ab attached to the Mag-Beads Protein G beads.



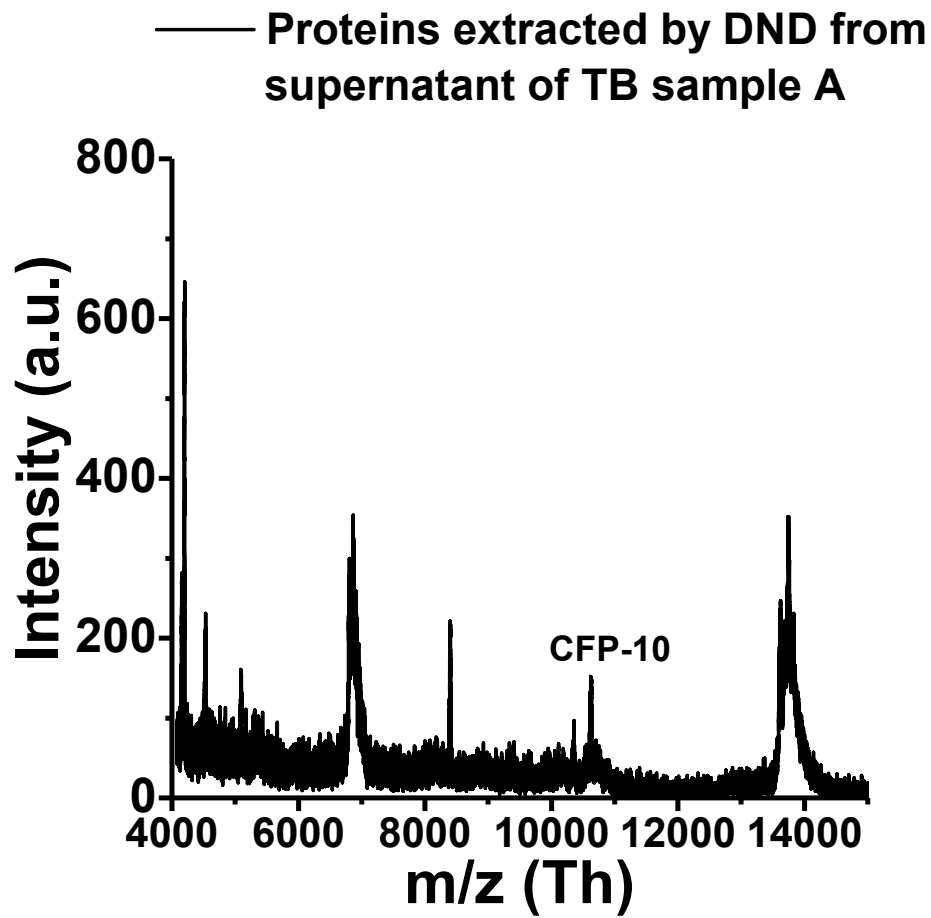

Figure S7 MALDI mass spectrum of the protein extracted by DND from leftover supernatant of the TB sample A. Only little CFP-10 ion signal was found.

**Table S1** Mascot analysis of TB samples extracted by DND with CHCA, DHB, and CI-CCA matrices

● **CHCA**

(a-1) CFP10 sequence coverage: 87%

**MAEMKTDAAT LAQEAGNFER ISGDLKTQID QVESTAGSLQ GQWRGAAGTA  
AQAAVVRFQE AANKQKQELD EISTNIRQAG VQYSRADEEQ QQALSSQMGF**

(a-2) Mascot analysis result of CFP10, Mascot score is 66

| Start-end | Observe   | Mr(expt)  | Miss | Peptide                     |
|-----------|-----------|-----------|------|-----------------------------|
| 1 – 5     | 609.3460  | 608.3387  | 0    | -.MAEMK.T                   |
| 2 – 20    | 2054.0080 | 2053.0007 | 1    | M.AEMKTDAATLAQEAGNFER.I     |
| 6 – 20    | 1593.5180 | 1592.5107 | 0    | K.TDAATLAQEAGNFER.I         |
| 27 – 44   | 2003.7050 | 2002.6977 | 0    | K.TQIDQVESTAGSLQGQWR.G      |
| 45 – 57   | 1142.6130 | 1141.6057 | 0    | R.GAAGTAAQAAVVR.F           |
| 65 – 77   | 1573.6060 | 1572.5987 | 1    | K.QKQELDEISTNIR.Q           |
| 67 – 77   | 1317.5530 | 1316.5457 | 0    | K.QELDEISTNIR.Q             |
| 78 – 85   | 908.5180  | 907.5107  | 0    | R.QAGVQYSR.A                |
| 78 – 100  | 2558.4290 | 2557.4217 | 1    | R.QAGVQYSRADEEQQQALSSQMGF.- |

● **DHB**

(b-1) CFP10 sequence coverage: 87%

**MAEMKTDAAT LAQEAGNFER ISGDLKTQID QVESTAGSLQ GQWRGAAGTA  
AQAAVVRFQE AANKQKQELD EISTNIRQAG VQYSRADEEQ QQALSSQMGF**

(b-2) Mascot analysis result of CFP10, Mascot score is 65

| Start-end | Observe   | Mr(expt)  | Miss | Peptide                  |
|-----------|-----------|-----------|------|--------------------------|
| 1 – 5     | 625.4120  | 624.4047  | 0    | -.MAEMK.T+ Oxidation (M) |
| 2 – 20    | 2053.7400 | 2052.7327 | 1    | M.AEMKTDAATLAQEAGNFER.I  |
| 6 – 20    | 1594.1020 | 1593.0947 | 0    | K.TDAATLAQEAGNFER.I      |

|          |           |           |   |                            |
|----------|-----------|-----------|---|----------------------------|
| 27 – 44  | 2004.6430 | 2003.6357 | 0 | K.TQIDQVESTAGSLQGQWR.G     |
| 45 – 57  | 1142.8300 | 1141.8227 | 0 | R.GAAGTAAQAAVVR.F          |
| 65 – 77  | 1574.0720 | 1573.0647 | 1 | K.QKQELDEISTNIR.Q          |
| 78 – 85  | 908.5950  | 907.5877  | 0 | R.QAGVQYSR.A               |
| 78 – 100 | 2559.5270 | 2558.5197 | 1 | R.QAGVQYSRADEEQQALSSQMGF.- |
| 86 – 100 | 1668.1340 | 1667.1267 | 0 | R.ADEEQQALSSQMGF.-         |

## ● CI-CCA (without the deletion of ACR)

(c-1) ACR sequence coverage: 59%

**MATTLPVQRH PRSLFPEFSE LFAAFPSFAG LRPTFDTRLM RLEDEMKEGR**  
**YEVRAELPGV DPKDVDIMV RDGQLTIKAE RTEQKDFDGR SEFAYGSFVR**  
**TVSLPVGAD EDDIKATYDKG ILTVSVAVSE GKPTEKHIQI RSTN**

(c-2) Mascot analysis result of ACR, Mascot score is 66

| Start-end | Observe   | Mr(expt)  | Miss | Peptide                      |
|-----------|-----------|-----------|------|------------------------------|
| 2 – 9     | 885.4510  | 884.4437  | 0    | M.ATTLPVQR.H                 |
| 42 – 50   | 1106.6370 | 1105.6297 | 1    | R.LEDEMKEGR.Y                |
| 42 – 50   | 1121.6200 | 1120.6127 | 1    | R.LEDEMKEGR.Y+ Oxidation (M) |
| 48 – 54   | 908.2080  | 907.2007  | 1    | K.EGRYEV.R                   |
| 51 – 54   | 566.3540  | 565.3467  | 0    | R.YEV.R                      |
| 51 – 4    | 1588.7760 | 1587.7687 | 1    | R.YEVRAELPGVDPDK.D           |
| 55 – 71   | 1869.2750 | 1868.2677 | 1    | R.AELPGVDPDKDVDIMVR.D        |
| 65 – 71   | 847.5490  | 846.5417  | 0    | K.DVDIMVR.D                  |
| 72 – 78   | 774.5140  | 773.5067  | 0    | R.DGQLTIK.A                  |
| 82 – 90   | 1095.6310 | 1094.6237 | 1    | R.TEQKDFDGR.S                |
| 86 – 90   | 609.3620  | 608.3547  | 0    | K.DFDGR.S                    |
| 91 – 100  | 1162.7530 | 1161.7457 | 0    | R.SEFAYGSFVR.T               |
| 120 – 141 | 2364.2300 | 2363.2227 | 1    | K.GILTVSVAVSEGKPTEKHIQIR.S   |

137 – 141 666.4880 665.4807 0 K.HIQIR.S

---

(c-3) CFP10 sequence coverage : 94%

**MAEMKTDAAT LAQEAGNFER ISGDLKTQID QVESTAGSLQ GQWRGAAGTA**  
**AQAAVVRFQE AANKQKQELD EISTNIRQAG VQYSRADEEQ QQALSSQMGF**

(c-4) Mascot analysis result of CFP10, Mascot score is 54

---

| Start-end | Observe   | Mr(expt)  | Miss | Peptide                             |
|-----------|-----------|-----------|------|-------------------------------------|
| 1 – 5     | 609.3620  | 608.3547  | 0    | -.MAEMK.T                           |
| 6 – 20    | 1594.1860 | 1593.1787 | 0    | K.TDAATLAQEAGNFER.I                 |
| 27 – 57   | 3127.0220 | 3126.0147 | 1    | K.TQIDQVESTAGSLQGQWRGAAGTAAQAAVVR.F |
| 45 – 57   | 1142.8420 | 1141.8347 | 0    | R.GAAGTAAQAAVVR.F                   |
| 58 – 64   | 807.4920  | 806.4847  | 0    | R.FQEAANK.Q                         |
| 65 – 77   | 1574.2020 | 1573.1947 | 1    | K.QKQELDEISTNIR.Q                   |
| 78 – 85   | 908.2080  | 907.2007  | 0    | R.QAGVQYSR.A                        |
| 78 – 100  | 2559.5940 | 2558.5867 | 1    | R.QAGVQYSRADEEQQALSSQMGF.-          |
| 86 – 100  | 1669.4120 | 1668.4047 | 0    | R.ADEEQQALSSQMGF.-                  |

---

### ● CI-CCA (deletion of ACR)

(d-1) CFP10 sequence coverage: 94%

**MAEMKTDAAT LAQEAGNFER ISGDLKTQID QVESTAGSLQ GQWRGAAGTA**  
**AQAAVVRFQE AANKQKQELD EISTNIRQAG VQYSRADEEQ QQALSSQMGF**

(d-2) Mascot analysis result of CFP10, Mascot score is 55

---

| Start-end | Observe   | Mr(expt)  | Miss | Peptide                             |
|-----------|-----------|-----------|------|-------------------------------------|
| 1 – 5     | 609.3450  | 608.3377  | 0    | -.MAEMK.T                           |
| 6 – 20    | 1594.1300 | 1593.1227 | 0    | K.TDAATLAQEAGNFER.I                 |
| 27 – 44   | 2004.7380 | 2003.7307 | 0    | K.TQIDQVESTAGSLQGQWR.G              |
| 27 – 57   | 3127.2820 | 3126.2747 | 1    | K.TQIDQVESTAGSLQGQWRGAAGTAAQAAVVR.F |
| 45 – 57   | 1142.8230 | 1141.8157 | 0    | R.GAAGTAAQAAVVR.F                   |

---

|          |           |           |   |                            |
|----------|-----------|-----------|---|----------------------------|
| 58 – 64  | 807.4630  | 806.4557  | 0 | R.FQEAANK.Q                |
| 65 – 77  | 1574.1550 | 1573.1477 | 1 | K.QKQELDEISTNIR.Q          |
| 78 – 85  | 908.3740  | 907.3667  | 0 | R.QAGVQYSR.A               |
| 78 – 100 | 2559.9670 | 2558.9597 | 1 | R.QAGVQYSRADEEQQALSSQMGF.- |
| 86 – 100 | 1669.1380 | 1668.1307 | 0 | R.ADEEQQALSSQMGF.-         |

(d-3) ESAT6 sequence coverage: 100%

**MTEQQWNFAG IEAAASAIQG NVTSIHSLLD EGKQSLTKLA AAWGGSGSEA  
YQGVQKQWDA TATELNNALQ NLARTISEAG QAMASTEGNV TGMFA**

(d-4) Mascot analysis result of ESAT6, Mascot score is 51

| Start-end | Observe   | Mr(expt)  | Miss | Peptide                                     |
|-----------|-----------|-----------|------|---------------------------------------------|
| 1 – 33    | 3514.7730 | 3513.7657 | 0    | -.MTEQQWNFAGIEAAASAIQGNVTSIHSLLDDEGK.Q      |
| 2 – 33    | 3387.6210 | 3386.6137 | 0    | M.TEQQWNFAGIEAAASAIQGNVTSIHSLLDDEGK.Q       |
| 2 – 38    | 3943.2920 | 3942.2847 | 1    | M.TEQQWNFAGIEAAASAIQGNVTSIHSLLDDEGKQSLTK.L  |
| 34 – 38   | 576.3780  | 575.3707  | 0    | K.QSLTK.L                                   |
| 39 – 57   | 1909.2270 | 1908.2197 | 0    | K.LAAAWGGSGSEAYQGVQK.W                      |
| 39 – 74   | 3792.0670 | 3791.0597 | 1    | K.LAAAWGGSGSEAYQGVQKWDATATELNNALQNLAR.T     |
| 58 – 74   | 1901.7320 | 1900.7247 | 0    | K.WDATATELNNALQNLAR.T                       |
| 58 – 95   | 3988.9560 | 3987.9487 | 1    | K.WDATATELNNALQNLARTISEAGQAMASTEGNV TGMFA.- |

Oxidation (M)
